# Supplementary material for: A Transcriptome Analysis of mRNAs and Long Non-Coding RNAs in Patients with Parkinson’s Disease
Source: MDPI journal article supplement (doi:10.3390/ijms23031535), 2022-01-28
Supplement: s1 [file s1]

**Supplementar Table S1.** List of underexpressed ( $|\text{FC}| \geq 1.50$ ) RNA found in our study.

| Underexpressed RNA |                    |            |                    |                         |
|--------------------|--------------------|------------|--------------------|-------------------------|
| Gene               | Fold Change        | Chromosome | Gene               | RNA type                |
| NOG                | -3.75 <sup>f</sup> | chr17      | ENSG00000183691.6  | protein coding          |
| CCL20              | -3.02 <sup>a</sup> | chr2       | ENSG00000115009.13 | protein coding          |
| LRRN3              | -2.73 <sup>c</sup> | chr7       | ENSG00000173114.13 | protein coding          |
| RNA5SP352          | -2.66 <sup>b</sup> | chr11      | ENSG00000200278.1  | rRNA pseudogene         |
| IGKV1-39           | -2.52 <sup>b</sup> | KQ031384.1 | ENSG00000282120.1  | IG V gene               |
| IGKV1-39           | -2.52 <sup>b</sup> | chr2       | ENSG00000242371.1  | IG V gene               |
| IGLV8-61           | -2.43 <sup>b</sup> | chr22      | ENSG00000211638.2  | IG V gene               |
| TNFRSF17           | -2.36 <sup>c</sup> | chr16      | ENSG0000048462.11  | protein coding          |
| IGKV2D-40          | -2.32 <sup>a</sup> | chr2       | ENSG00000251039.2  | IG V gene               |
| CCR9               | -2.31 <sup>f</sup> | chr3       | ENSG00000173585.16 | protein coding          |
| IGKV1-5            | -2.28 <sup>b</sup> | KQ031384.1 | ENSG00000282801.1  | IG V gene               |
| IGKV1-5            | -2.28 <sup>b</sup> | chr2       | ENSG00000243466.1  | IG V gene               |
| IGKV1-33           | -2.26 <sup>b</sup> | chr2       | ENSG00000242076.2  | IG V gene               |
| IGKV1-33           | -2.26 <sup>b</sup> | KQ031384.1 | ENSG00000282811.1  | IG V gene               |
| PTGS2              | -2.22 <sup>a</sup> | chr1       | ENSG00000073756.13 | protein coding          |
| MXRA8              | -2.11 <sup>b</sup> | chr1       | ENSG00000162576.17 | protein coding          |
| IL1B               | -2.08 <sup>a</sup> | chr2       | ENSG00000125538.12 | protein coding          |
| IGLC6              | -2.07 <sup>b</sup> | chr22      | ENSG00000222037.5  | IG C pseudogene         |
| GLDC               | -2.06 <sup>b</sup> | chr9       | ENSG00000178445.10 | protein coding          |
| CD248              | -2.05 <sup>c</sup> | chr11      | ENSG00000174807.4  | protein coding          |
| HRK                | -2.03 <sup>c</sup> | chr12      | ENSG00000135116.9  | protein coding          |
| IGKV1D-16          | -2 <sup>a</sup>    | chr2       | ENSG00000241244.1  | IG V gene               |
| BHLHA15            | -1.99 <sup>b</sup> | chr7       | ENSG00000180535.4  | protein coding          |
| IGHV3-33           | -1.98 <sup>c</sup> | chr14      | ENSG00000211955.2  | IG V gene               |
| IGHV3-33           | -1.98 <sup>c</sup> | KI270846.1 | ENSG00000282642.1  | IG V gene               |
| AL132996.1         | -1.98 <sup>b</sup> | chr6       | ENSG00000260271.3  | lncRNA                  |
| MAILR              | -1.98 <sup>b</sup> | chr8       | ENSG00000253320.7  | lncRNA                  |
| LINC00487          | -1.96 <sup>a</sup> | chr2       | ENSG00000205837.7  | lncRNA                  |
| CPA5               | -1.94 <sup>a</sup> | chr7       | ENSG00000158525.16 | protein coding          |
| CACHD1             | -1.94 <sup>b</sup> | chr1       | ENSG00000158966.16 | protein coding          |
| LINC02295          | -1.93 <sup>c</sup> | chr14      | ENSG00000258511.1  | lncRNA                  |
| IGLV1-47           | -1.93 <sup>b</sup> | chr22      | ENSG00000211648.2  | IG V gene               |
| JCHAIN             | -1.93 <sup>b</sup> | chr4       | ENSG00000132465.12 | protein coding          |
| FGF14-AS2          | -1.91 <sup>a</sup> | chr13      | ENSG00000272143.1  | lncRNA                  |
| AC097634.1         | -1.91 <sup>b</sup> | chr3       | ENSG00000270562.1  | lncRNA                  |
| ASIC1              | -1.9 <sup>b</sup>  | chr12      | ENSG00000110881.12 | protein coding          |
| EVPL               | -1.89 <sup>b</sup> | chr17      | ENSG00000167880.8  | protein coding          |
| ROBO1              | -1.89 <sup>a</sup> | chr3       | ENSG00000169855.20 | protein coding          |
| IGLV3-10           | -1.89 <sup>b</sup> | chr22      | ENSG00000211669.3  | IG V gene               |
| ZNF285             | -1.87 <sup>c</sup> | chr19      | ENSG00000267508.6  | protein coding          |
| FOXJ1              | -1.87 <sup>a</sup> | chr17      | ENSG00000129654.8  | protein coding          |
| IGKV4-1            | -1.85 <sup>b</sup> | chr2       | ENSG00000211598.2  | IG V gene               |
| IGKV3-11           | -1.85 <sup>b</sup> | chr2       | ENSG00000241351.3  | IG V gene               |
| IGKV3-11           | -1.85 <sup>b</sup> | KQ031384.1 | ENSG00000282823.1  | IG V gene               |
| AC234301.1         | -1.81 <sup>b</sup> | KI270846.1 | ENSG00000278082.3  | IG V gene               |
| AC010331.1         | -1.79 <sup>a</sup> | chr19      | ENSG00000277383.1  | lncRNA                  |
| SFRP5              | -1.77 <sup>a</sup> | chr10      | ENSG00000120057.5  | protein coding          |
| NKX3-1             | -1.77 <sup>a</sup> | chr8       | ENSG00000167034.10 | protein coding          |
| IGLC3              | -1.75 <sup>a</sup> | chr22      | ENSG00000211679.2  | IG C gene               |
| LINC02848          | -1.75 <sup>b</sup> | chr7       | ENSG00000226581.2  | lncRNA                  |
| WNT16              | -1.71 <sup>a</sup> | chr7       | ENSG00000002745.13 | protein coding          |
| LEF1-AS1           | -1.7 <sup>c</sup>  | chr4       | ENSG00000232021.7  | lncRNA                  |
| LINC02132          | -1.7 <sup>a</sup>  | chr16      | ENSG00000268804.1  | lncRNA                  |
| C17orf100          | -1.69 <sup>c</sup> | chr17      | ENSG00000256806.6  | protein coding          |
| IGKJ5              | -1.69 <sup>b</sup> | chr2       | ENSG00000211593.2  | IG J gene               |
| IGLV2-23           | -1.68 <sup>b</sup> | chr22      | ENSG00000211660.3  | IG V gene               |
| IGLV2-14           | -1.68 <sup>a</sup> | chr22      | ENSG00000211666.2  | IG V gene               |
| CR2                | -1.67 <sup>b</sup> | chr1       | ENSG00000117322.18 | protein coding          |
| IGKV3D-11          | -1.67 <sup>a</sup> | chr2       | ENSG00000211632.4  | IG V gene               |
| IGLL5              | -1.67 <sup>b</sup> | chr22      | ENSG00000254709.8  | protein coding          |
| NRCAM              | -1.67 <sup>a</sup> | chr7       | ENSG00000091129.21 | protein coding          |
| RNU4-62P           | -1.67 <sup>a</sup> | chr3       | ENSG00000222057.1  | snRNA                   |
| IGHM               | -1.66 <sup>b</sup> | KI270846.1 | ENSG00000282657.3  | IG C gene               |
| IGHM               | -1.66 <sup>b</sup> | chr14      | ENSG00000211899.10 | IG C gene               |
| TLR10              | -1.65 <sup>b</sup> | chr4       | ENSG00000174123.11 | protein coding          |
| AC009123.1         | -1.65 <sup>a</sup> | chr16      | ENSG00000250685.7  | lncRNA                  |
| AL390719.1         | -1.65 <sup>a</sup> | chr1       | ENSG00000217801.10 | transcribed unprocessed |
| PLLP               | -1.64 <sup>b</sup> | chr16      | ENSG00000102934.10 | protein coding          |

|             |                      |            |                    |                         |
|-------------|----------------------|------------|--------------------|-------------------------|
| MIR3142HG   | -1.64 <sup>b</sup>   | chr5       | ENSG00000253522.6  | lncRNA                  |
| IGLJ2       | -1.63 <sup>a</sup>   | chr22      | ENSG00000211676.2  | IG J gene               |
| TTC24       | -1.62 <sup>def</sup> | chr1       | ENSG00000187862.13 | protein coding          |
| RNF157-AS1  | -1.62 <sup>b</sup>   | chr17      | ENSG00000267128.2  | lncRNA                  |
| AMN         | -1.61 <sup>c</sup>   | chr14      | ENSG00000166126.11 | protein coding          |
| AC009237.14 | -1.6 <sup>a</sup>    | chr2       | ENSG00000272913.1  | lncRNA                  |
| IGLV2-8     | -1.6 <sup>a</sup>    | chr22      | ENSG00000278196.3  | IG V gene               |
| IGKV3-20    | -1.58 <sup>a</sup>   | KQ031384.1 | ENSG00000282402.1  | IG V gene               |
| IGKV3-20    | -1.58 <sup>a</sup>   | chr2       | ENSG00000239951.1  | IG V gene               |
| ZNF2        | -1.58 <sup>b</sup>   | chr2       | ENSG00000275111.5  | protein coding          |
| IGLV2-11    | -1.58 <sup>a</sup>   | chr22      | ENSG00000211668.2  | IG V gene               |
| AL442128.2  | -1.58 <sup>b</sup>   | chr13      | ENSG00000277767.1  | lncRNA                  |
| IGLV3-9     | -1.58 <sup>a</sup>   | chr22      | ENSG00000211670.2  | IG V gene               |
| KLHL33      | -1.58 <sup>a</sup>   | chr14      | ENSG00000185271.9  | protein coding          |
| IGKV2-28    | -1.57 <sup>a</sup>   | KQ031384.1 | ENSG00000282025.1  | IG V gene               |
| IGKV2-28    | -1.57 <sup>a</sup>   | chr2       | ENSG00000244116.3  | IG V gene               |
| LIMD1-AS1   | -1.57 <sup>c</sup>   | chr3       | ENSG00000230530.2  | lncRNA                  |
| CHAC2       | -1.56 <sup>a</sup>   | chr2       | ENSG00000143942.5  | protein coding          |
| C12orf60    | -1.56 <sup>a</sup>   | chr12      | ENSG00000182993.5  | protein coding          |
| TRPM5       | -1.56 <sup>a</sup>   | chr11      | ENSG00000070985.13 | protein coding          |
| AL034550.2  | -1.56 <sup>b</sup>   | chr20      | ENSG00000277301.1  | lncRNA                  |
| AEBP1       | -1.55 <sup>c</sup>   | chr7       | ENSG00000106624.11 | protein coding          |
| AC103563.7  | -1.55 <sup>b</sup>   | chr2       | ENSG00000233850.1  | lncRNA                  |
| ZNF215      | -1.54 <sup>a</sup>   | chr11      | ENSG00000149054.16 | protein coding          |
| IGKC        | -1.54 <sup>a</sup>   | chr2       | ENSG00000211592.8  | IG C gene               |
| CISH        | -1.53 <sup>b</sup>   | chr3       | ENSG00000114737.16 | protein coding          |
| IL6R-AS1    | -1.52 <sup>a</sup>   | chr1       | ENSG00000228013.1  | lncRNA                  |
| BCL7A       | -1.52 <sup>b</sup>   | chr12      | ENSG00000110987.9  | protein coding          |
| SLC35F3     | -1.52 <sup>b</sup>   | chr1       | ENSG00000183780.13 | protein coding          |
| MIR4458HG   | -1.52 <sup>b</sup>   | chr5       | ENSG00000247516.8  | lncRNA                  |
| SIGLEC6     | -1.52 <sup>a</sup>   | chr19      | ENSG00000105492.16 | protein coding          |
| IGKJ4       | -1.51 <sup>a</sup>   | chr2       | ENSG00000211594.2  | IG J gene               |
| ZNF667-AS1  | -1.51 <sup>a</sup>   | chr19      | ENSG00000166770.11 | lncRNA                  |
| IGLV2-5     | -1.51 <sup>a</sup>   | chr22      | ENSG00000253234.1  | IG V pseudogene         |
| AMACR       | -1.51 <sup>b</sup>   | chr5       | ENSG00000242110.8  | protein coding          |
| IGLV6-57    | -1.5 <sup>a</sup>    | chr22      | ENSG00000211640.4  | IG V gene               |
| CNFN        | -1.5 <sup>a</sup>    | chr19      | ENSG00000105427.10 | protein coding          |
| E2F5        | -1.5 <sup>b</sup>    | chr8       | ENSG00000133740.11 | protein coding          |
| RHPN1       | -1.5 <sup>b</sup>    | chr8       | ENSG00000158106.14 | protein coding          |
| CD180       | -1.5 <sup>b</sup>    | chr5       | ENSG00000134061.5  | protein coding          |
| PDE4DIPP6   | -1.5 <sup>a</sup>    | chr1       | ENSG00000231551.8  | transcribed unprocessed |
| CETN3       | -1.5 <sup>b</sup>    | chr5       | ENSG00000153140.9  | protein coding          |
| CCR12P      | -1.5 <sup>b</sup>    | chr13      | ENSG00000238241.2  | transcribed unprocessed |
| IGKJ3       | -1.49 <sup>a</sup>   | chr2       | ENSG00000211595.2  | IG J gene               |
| IGLV3-1     | -1.48 <sup>a</sup>   | chr22      | ENSG00000211673.2  | IG V gene               |
| IGLC2       | -1.47 <sup>a</sup>   | chr22      | ENSG00000211677.2  | IG C gene               |
| PPIAP45     | -1.43 <sup>a</sup>   | chr12      | ENSG00000258116.1  | processed pseudogene    |
| TRAV13-2    | -1.41 <sup>b</sup>   | chr14      | ENSG00000211791.2  | TR V gene               |
| IGLV3-19    | -1.4 <sup>a</sup>    | chr22      | ENSG00000211663.2  | IG V gene               |
| MIR3671     | -1.39 <sup>a</sup>   | chr1       | ENSG00000265996.1  | miRNA                   |
| AC104581.4  | -1.38 <sup>a</sup>   | chr17      | ENSG00000280046.1  | TEC                     |
| ANKRD36BP2  | -1.36 <sup>a</sup>   | chr2       | ENSG00000230006.7  | transcribed unprocessed |
| TRAV4       | -1.32 <sup>a</sup>   | chr14      | ENSG00000211778.2  | TR V gene               |
| TRAV12-3    | -1.3 <sup>a</sup>    | chr14      | ENSG00000211794.3  | TR V gene               |
| AL031009.1  | -1.29 <sup>a</sup>   | chr16      | ENSG00000278987.1  | TEC                     |
| HSD17B7P2   | -1.26 <sup>a</sup>   | chr10      | ENSG00000099251.14 | transcribed unprocessed |
| SUZ12P1     | -1.14 <sup>a</sup>   | chr17      | ENSG00000264538.6  | transcribed unprocessed |
| IGKV2-30    | -1.05 <sup>a</sup>   | KQ031384.1 | ENSG00000281933.1  | IG V gene               |
| IGKV2-30    | -1.05 <sup>a</sup>   | chr2       | ENSG00000243238.1  | IG V gene               |
| RNU4-2      | -1.03 <sup>b</sup>   | chr12      | ENSG00000202538.1  | snRNA                   |
| RNU5A-1     | -1.03 <sup>a</sup>   | chr15      | ENSG00000199568.1  | snRNA                   |
| RNU4-1      | -1.02 <sup>b</sup>   | chr12      | ENSG00000200795.1  | snRNA                   |
| PCBP2P2     | 1.15 <sup>a</sup>    | chr8       | ENSG00000253341.1  | processed pseudogene    |
| EIF4A1P10   | 1.23 <sup>a</sup>    | chrX       | ENSG00000229132.2  | processed pseudogene    |
| EIF4BP6     | 1.23 <sup>b</sup>    | chr7       | ENSG00000197258.5  | processed pseudogene    |
| DGKZP1      | 1.25 <sup>a</sup>    | chr13      | ENSG00000179611.3  | processed pseudogene    |
| TPH1P1      | 1.28 <sup>a</sup>    | chr1       | ENSG00000226415.1  | processed pseudogene    |
| EIF4BP3     | 1.29 <sup>b</sup>    | chr9       | ENSG00000224546.2  | processed pseudogene    |
| MIR7848     | 1.3 <sup>a</sup>     | chr8       | ENSG00000276961.1  | miRNA                   |
| EEF1A1P5    | 1.31 <sup>a</sup>    | chr9       | ENSG00000196205.8  | processed pseudogene    |
| GAPDHP1     | 1.31 <sup>a</sup>    | chrX       | ENSG00000228232.1  | processed pseudogene    |
| ANXA2P2     | 1.33 <sup>b</sup>    | chr9       | ENSG00000231991.4  | processed pseudogene    |

|                                                                                          |                   |       |                   |                        |
|------------------------------------------------------------------------------------------|-------------------|-------|-------------------|------------------------|
| <b>PTMAP2</b>                                                                            | 1.35 <sup>a</sup> | chr5  | ENSG00000197744.5 | processed pseudogene   |
| <b>AC100827.2</b>                                                                        | 1.35 <sup>b</sup> | chr15 | ENSG00000260144.1 | unprocessed pseudogene |
| <b>AC016739.1</b>                                                                        | 1.35 <sup>a</sup> | chr2  | ENSG00000218175.2 | processed pseudogene   |
| <b>EEF1DP7</b>                                                                           | 1.36 <sup>a</sup> | chr17 | ENSG00000263883.1 | transcribed processed  |
| <b>MIR5094</b>                                                                           | 1.41 <sup>a</sup> | chr15 | ENSG00000264966.1 | miRNA                  |
| <b>RN7SKP296</b>                                                                         | 1.44 <sup>a</sup> | chr3  | ENSG00000223117.1 | misc RNA               |
| <b>MSNP1</b>                                                                             | 1.45 <sup>b</sup> | chr5  | ENSG00000251593.1 | processed pseudogene   |
| <b>YWHAZP2</b>                                                                           | 1.45 <sup>a</sup> | chr2  | ENSG00000213236.3 | processed pseudogene   |
| <b>EEF1A1P10</b>                                                                         | 1.46 <sup>a</sup> | chr7  | ENSG00000243746.1 | processed pseudogene   |
| <b>EEF1A1P6</b>                                                                          | 1.47 <sup>b</sup> | chr7  | ENSG00000233476.3 | processed pseudogene   |
| <b>FTLP3</b>                                                                             | 1.47 <sup>b</sup> | chr20 | ENSG00000226608.3 | processed pseudogene   |
| <b>XRCC6P2</b>                                                                           | 1.49 <sup>a</sup> | chrX  | ENSG00000234825.3 | processed pseudogene   |
| Padj: a<0.05; b<0.01; c<0.001; d<0.0001; e<0.00001; f<0.000001; FC: fold change; Gene ID |                   |       |                   |                        |

**Supplementar Table S2.** List of overexpressed ( $|FC| \geq 1.50$ ) RNA found in our study.

| Overexpressed RNA |                    |            |                    |                             |
|-------------------|--------------------|------------|--------------------|-----------------------------|
| Gene              | Fold Change        | Chromosome | Gene               | RNA Type                    |
| MT-TW             | 66.69 <sup>b</sup> | chrM       | ENSG00000210117.1  | Mt tRNA                     |
| MT-TT             | 48.33 <sup>a</sup> | chrM       | ENSG00000210195.2  | Mt tRNA                     |
| MT-ND5            | 20.89 <sup>a</sup> | chrM       | ENSG00000198786.2  | protein coding              |
| MTCO1P12          | 19.42 <sup>a</sup> | chr1       | ENSG00000237973.1  | unprocessed pseudogene      |
| CA1               | 6.24 <sup>b</sup>  | chr8       | ENSG00000133742.14 | protein coding              |
| ADAMTS2           | 5.36 <sup>c</sup>  | chr5       | ENSG00000087116.16 | protein coding              |
| RPLP0P2           | 3.13 <sup>c</sup>  | chr11      | ENSG00000243742.5  | transcribed proc pseudogene |
| PPBP              | 3.11 <sup>a</sup>  | chr4       | ENSG00000163736.4  | protein coding              |
| IL1R2             | 2.95 <sup>b</sup>  | chr2       | ENSG00000115590.14 | protein coding              |
| MAP1B             | 2.39 <sup>b</sup>  | chr5       | ENSG00000131711.15 | protein coding              |
| CEACAM8           | 2.36 <sup>b</sup>  | chr19      | ENSG00000124469.12 | protein coding              |
| AL355472.1        | 2.3 <sup>b</sup>   | chr1       | ENSG00000235605.1  | proc pseudogene             |
| ITGB3             | 2.24 <sup>a</sup>  | chr17      | ENSG00000259207.9  | protein coding              |
| ITGA2B            | 2.21 <sup>c</sup>  | chr17      | ENSG00000005961.19 | protein coding              |
| MAOB              | 2.05 <sup>a</sup>  | chrX       | ENSG00000069535.14 | protein coding              |
| FIGN              | 2.05 <sup>a</sup>  | chr2       | ENSG00000182263.14 | protein coding              |
| EPGN              | 1.98 <sup>a</sup>  | chr4       | ENSG00000182585.10 | protein coding              |
| AQP10             | 1.97 <sup>b</sup>  | chr1       | ENSG00000143595.13 | protein coding              |
| MYL9              | 1.96 <sup>b</sup>  | chr20      | ENSG00000101335.10 | protein coding              |
| EPB42             | 1.87 <sup>a</sup>  | chr15      | ENSG00000166947.15 | protein coding              |
| OSBP2             | 1.87 <sup>b</sup>  | chr22      | ENSG00000184792.16 | protein coding              |
| ARG1              | 1.87 <sup>a</sup>  | chr6       | ENSG00000118520.15 | protein coding              |
| CEACAM6           | 1.87 <sup>a</sup>  | chr19      | ENSG00000086548.9  | protein coding              |
| LCN2              | 1.86 <sup>a</sup>  | chr9       | ENSG00000148346.12 | protein coding              |
| COL4A2            | 1.82 <sup>a</sup>  | chr13      | ENSG00000134871.19 | protein coding              |
| RNF11             | 1.79 <sup>a</sup>  | chr1       | ENSG00000123091.5  | protein coding              |
| AC025048.6        | 1.79 <sup>b</sup>  | chr17      | ENSG00000280852.2  | transcribed proc pseudogene |
| TRHDE             | 1.78 <sup>a</sup>  | chr12      | ENSG00000072657.9  | protein coding              |
| AC106865.1        | 1.77 <sup>a</sup>  | chr4       | ENSG00000250771.2  | transcribed unprocessed     |
| SAMD14            | 1.76 <sup>b</sup>  | chr17      | ENSG00000167100.15 | protein coding              |
| PROS1             | 1.76 <sup>a</sup>  | chr3       | ENSG00000184500.16 | protein coding              |
| GAPDHP65          | 1.75 <sup>b</sup>  | chrX       | ENSG00000235587.2  | proc pseudogene             |
| XK                | 1.75 <sup>b</sup>  | chrX       | ENSG00000047597.7  | protein coding              |
| TUBBP1            | 1.71 <sup>b</sup>  | chr8       | ENSG00000127589.4  | transcribed proc pseudogene |
| ALAS2             | 1.7 <sup>a</sup>   | chrX       | ENSG00000158578.21 | protein coding              |
| LINC02701         | 1.68 <sup>a</sup>  | chr11      | ENSG00000250508.1  | lncRNA                      |
| SAP30             | 1.67 <sup>c</sup>  | chr4       | ENSG00000164105.4  | protein coding              |
| DMTN              | 1.66 <sup>b</sup>  | chr8       | ENSG00000158856.18 | protein coding              |
| PCSK6             | 1.65 <sup>b</sup>  | chr15      | ENSG00000140479.18 | protein coding              |
| CMTM5             | 1.65 <sup>a</sup>  | chr14      | ENSG00000166091.21 | protein coding              |
| PRKAR2B           | 1.64 <sup>b</sup>  | chr7       | ENSG00000005249.13 | protein coding              |
| SPTB              | 1.64 <sup>b</sup>  | chr14      | ENSG00000070182.21 | protein coding              |
| SMOX              | 1.63 <sup>a</sup>  | chr20      | ENSG00000088826.18 | protein coding              |
| P2RY1             | 1.63 <sup>c</sup>  | chr3       | ENSG00000169860.7  | protein coding              |
| YWHAZP10          | 1.62 <sup>b</sup>  | chrX       | ENSG00000217624.2  | proc pseudogene             |
| MPO               | 1.62 <sup>a</sup>  | chr17      | ENSG00000005381.8  | protein coding              |
| RPL24P4           | 1.62 <sup>a</sup>  | chr6       | ENSG00000181524.6  | proc pseudogene             |
| VWF               | 1.61 <sup>b</sup>  | chr12      | ENSG00000110799.14 | protein coding              |
| AC132872.2        | 1.61 <sup>c</sup>  | chr17      | ENSG00000264548.1  | lncRNA                      |
| MIR3605           | 1.61 <sup>a</sup>  | chr1       | ENSG00000284154.1  | miRNA                       |
| CTDSPL            | 1.6 <sup>b</sup>   | chr3       | ENSG00000144677.15 | protein coding              |
| PLXNB3            | 1.59 <sup>a</sup>  | chrX       | ENSG00000198753.12 | protein coding              |
| CD9               | 1.58 <sup>a</sup>  | chr12      | ENSG00000010278.15 | protein coding              |
| SPX               | 1.58 <sup>a</sup>  | chr12      | ENSG00000134548.11 | protein coding              |
| TRIM58            | 1.56 <sup>a</sup>  | chr1       | ENSG00000162722.9  | protein coding              |
| MMRN1             | 1.54 <sup>a</sup>  | chr4       | ENSG00000138722.10 | protein coding              |
| PARD6G            | 1.53 <sup>a</sup>  | chr18      | ENSG00000178184.16 | protein coding              |
| FAXDC2            | 1.53 <sup>a</sup>  | chr5       | ENSG00000170271.11 | protein coding              |
| GOLGA6L5P         | 1.52 <sup>b</sup>  | chr15      | ENSG00000230373.8  | transcribed unprocessed     |
| AC093849.4        | 1.52 <sup>b</sup>  | chr4       | ENSG00000288025.1  | lncRNA                      |
| CRYZL2P-          | 1.51 <sup>a</sup>  | chr1       | ENSG00000254154.8  | lncRNA                      |
| AC134407.2        | 1.5 <sup>a</sup>   | chr17      | ENSG00000279573.1  | TEC                         |
| MSR1              | 1.5 <sup>b</sup>   | chr8       | ENSG00000038945.15 | protein coding              |

Padj: a<0.05; b<0.01; c<0.001; d<0.0001; e<0.00001; f<0.000001; FC: fold change; Gene ID
